# Supplementary material for: Intramolecular pyridine-based frustrated Lewis-pairs
Source: Royal Society of Chemistry journal article supplement (doi:10.1039/c5dt01068c), 2015-01-01
Supplement: c5dt01068c1.pdf [file c5dt01068c1.pdf]

## Supporting Information

### Inherently strong B–N bonds in pyridine-based intramolecular Lewis pairs

Leif A. Körte,<sup>a</sup> Robin Warner,<sup>a</sup> Yury V. Vishnevskiy,<sup>a</sup> Beate Neumann,<sup>a</sup> Hans-Georg Stammer<sup>a</sup> and Norbert W. Mitzel<sup>\*a</sup>

Bielefeld University, Faculty of Chemistry, Chair of Inorganic and Structural Chemistry, Centre for Molecular Materials CM<sub>2</sub>, Universitätsstraße 25, 33615 Bielefeld, Germany.

E-mail: mitzel@uni-bielefeld.de

Additional spectra of 2-[[bis(pentafluorophenyl)boryl]methyl]pyridine (**5**)

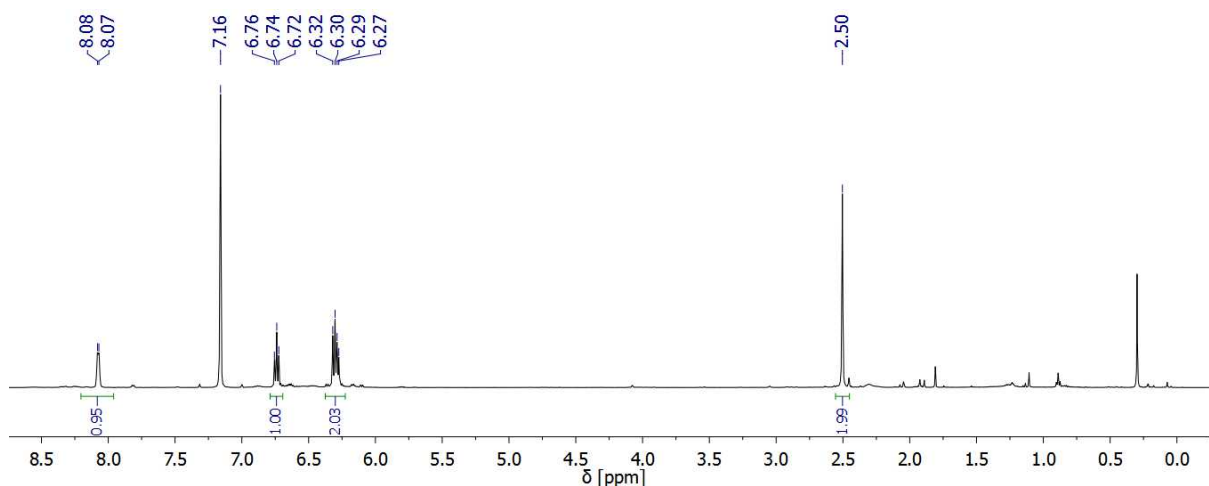

Figure 1: <sup>1</sup>H-NMR spectrum of compound **5** measured in benzene-d<sub>6</sub> (500 MHz) at ambient temperature. Additional peaks arise due to trace impurities with *n*-hexane and silicone-grease from the reaction and purification method.

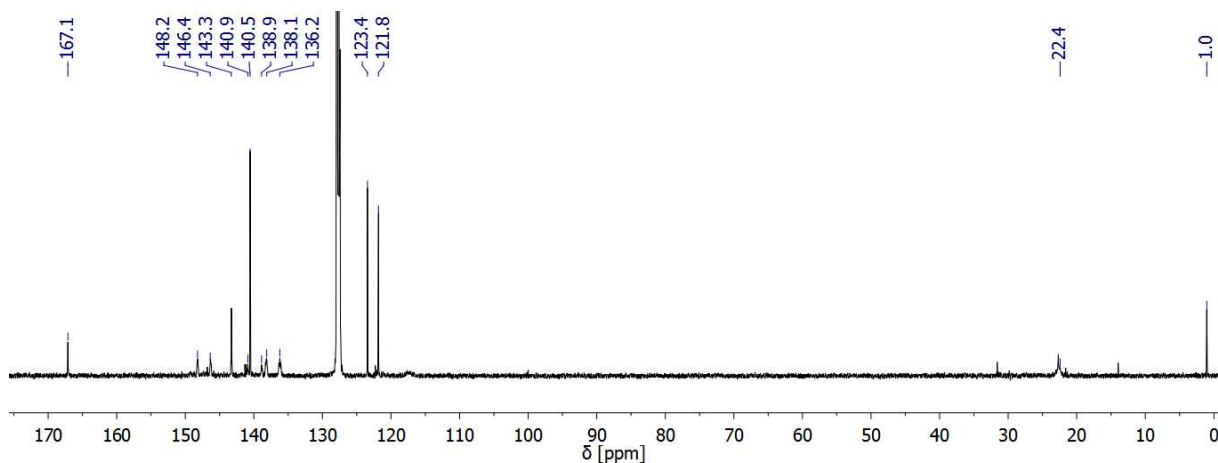

Figure 2: <sup>13</sup>C-NMR spectrum of compound **5** measured in benzene-d<sub>6</sub> (500 MHz) at ambient temperature. Additional peaks arise due to trace impurities with *n*-hexane and silicone-grease from the reaction and purification method.

Additional spectra of 2-[[bis(pentafluorophenyl)boryl]methyl]-4-dimethylamino-6-methylpyridine (**9**)

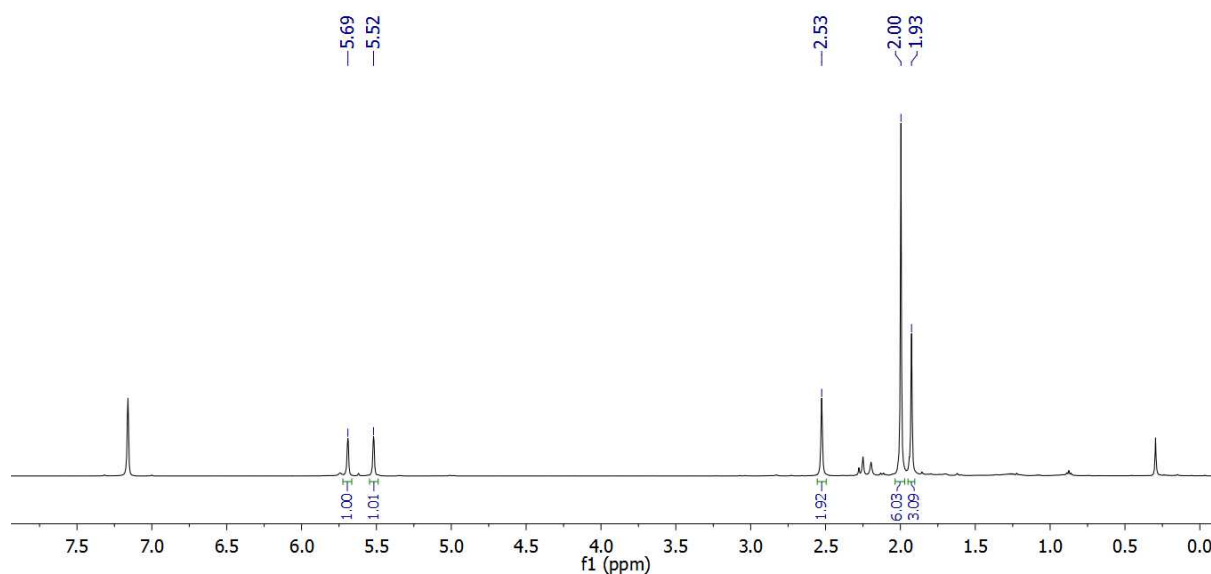

Figure 3: <sup>1</sup>H-NMR spectrum of compound **9** measured in benzene-d<sub>6</sub> (500 MHz) at ambient temperature.

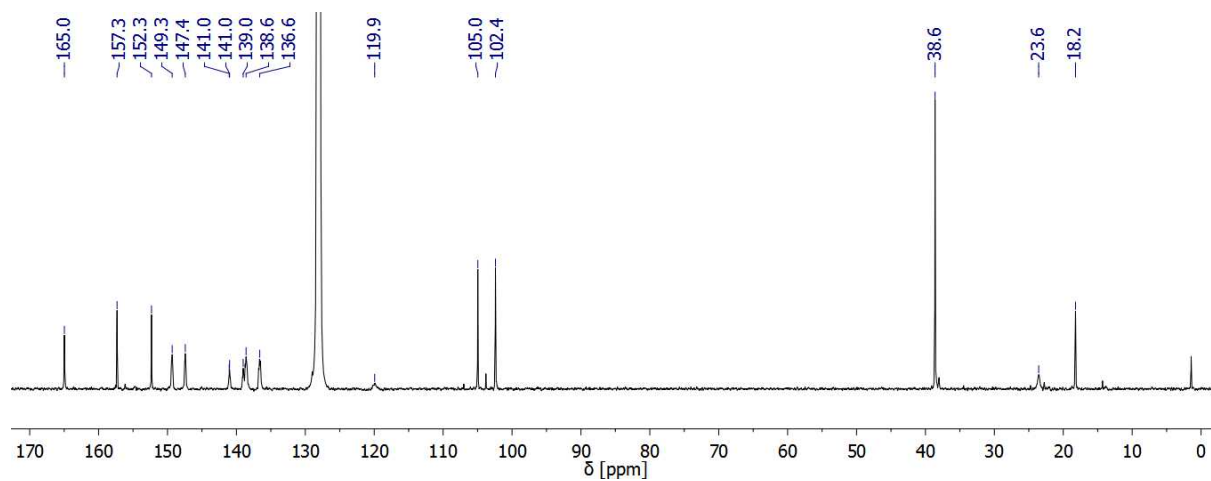

Figure 4: <sup>13</sup>C-NMR spectrum of compound **9** measured in benzene-d<sub>6</sub> (500 MHz) at ambient temperature.

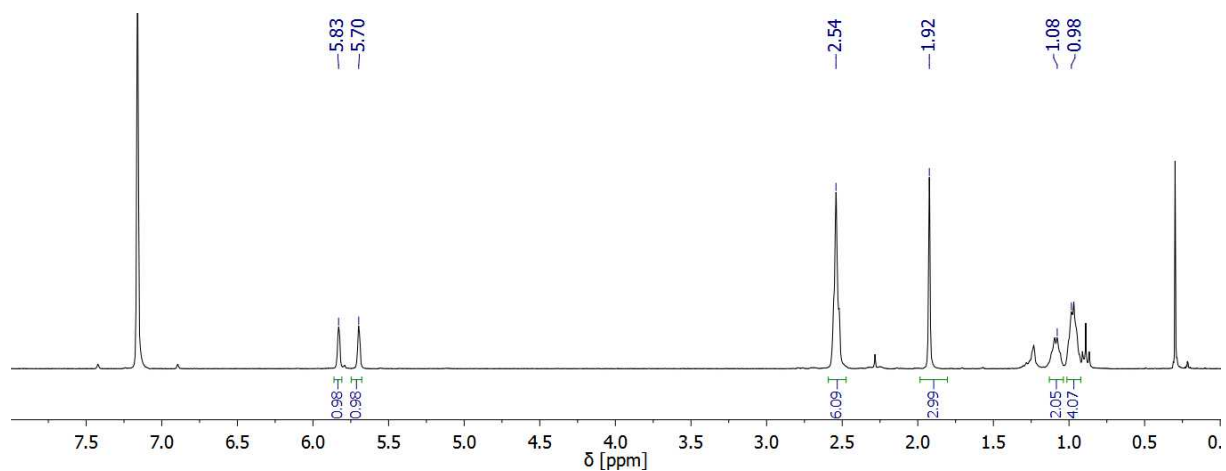

Figure 5:  $^1\text{H}$ -NMR spectrum of compound **12** measured in benzene- $d_6$  (500 MHz) at ambient temperature. Additional peaks arise due to trace impurities with *n*-hexane, toluene and silicone-grease from the reaction and purification method.

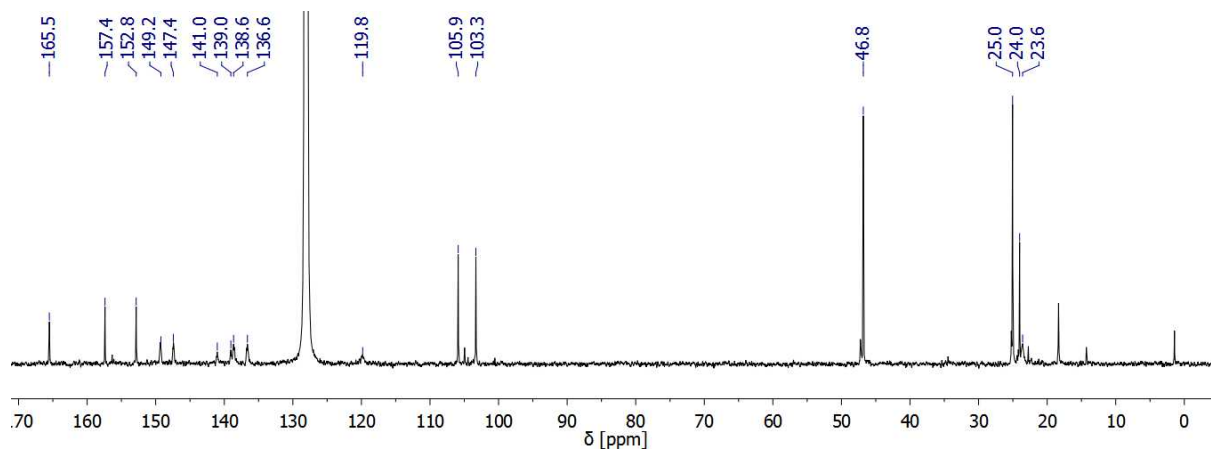

Figure 6:  $^{13}\text{C}$ -NMR spectrum of compound **12** measured in benzene- $d_6$  (500 MHz) at ambient temperature. Additional peaks arise due to trace impurities with *n*-hexane, toluene and silicone-grease from the reaction and purification method.
